# Supplementary material for: N-Terminal Region of GbIspH1, Ginkgo biloba IspH Type 1, May Be Involved in the pH-Dependent Regulation of Enzyme Activity
Source: Bioinorg Chem Appl. 2015 Mar 29;2015:241479. doi: 10.1155/2015/241479 (PMC4393896; doi:10.1155/2015/241479)
Supplement: Supplementary file 1 — Supplementary Material containing experimental details and more supporting data. [file 241479.f1.docx]

Supplementary Material

***N*-Terminal Region of GbHDR1, *Ginkgo biloba* 4-Hydroxy-3-methylbut-2-enyl Diphosphate Reductase Type 1, May Be Involved in the pH-Dependent Regulation of Enzyme Activity**

Bok-Kyu Shin,1 Joong-Hoon Ahn2 and Jaehong Han1*

**Experimental details**

**E1. Fe Analysis**1,2

The iron content of GbHDR1 was measured by absorption at 593 nm of Fe2+-ferene (disodium salt of 5,5'-[3-(2-pyridyl)-1,2,4-triazine-5,6-diyl]bis-2-furansulfonic acid) complex. Three solutions, **a**, **b**, and **c**, were prepared before the measurement. **a**; sodium dodecyl sulfate (1.35 g, 4.68 mmol) in 30 mL of H2O was mixed with 0.45 mL of saturated sodium acetate solution, **b**; ascorbic acid (270 mg, 1.50 mmol) and sodium metabisulfite (Na2S2O5, 9 mg, 0.05 mmol) in 5.6 mL of H2O was mixed with 0.4 mL of saturated sodium acetate solution, and **c**; ferene (18 mg, 0.036 mmol) in 1 mL of H2O. Protein solution (50 µL) was mixed with 50 µL of solution **a**, and then followed by addition of solution **b** (50 µL). After incubation at 30 ºC for 15 minutes, 2.5 µL of solution **c** was added to the mixture. The final solution was stored at room temperature at least for 5 min before the detection at 593 nm. A calibration curve was obtained with iron(II) perchlorate at the range of 0 – 100 µM of Fe ions. Calibration curve; y = 0.0075 x + 0.0395, R2 = 0.9905.


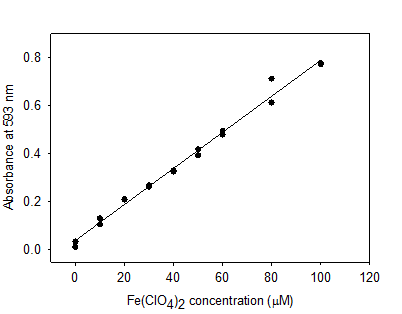


| GbHDR1 | Fe contents (μM) | | | Protein (μM) | | | Fe/protein | | |
| --- | --- | --- | --- | --- | --- | --- | --- | --- | --- |
| AVE | SD | RSD | AVE | SD | RSD | AVE | SD | RSD |
| **GbHDR1-full** | **1,059.1** | **29.7** | **2.8** | **343** | **26** | **7.6** | **3.09** | **0.25** | **8.1** |
| **GbHDR1-truncated** | **1,293.7** | **51.5** | **4.0** | **371** | **23** | **6.2** | **3.49** | **0.26** | **7.4** |

1. Kennedy, M. C., Kent, T. A., Emptage, M., Merkle, H., Beinert, H., and Munck, E. (1984) Evidence for the formation of a linear [3Fe-4S] cluster in partially unfolded aconitase. J Biol Chem 259, 14463-14471.
2. Yan, A., and Kiley, P. J. (2009) Techniques to isolate O2-sensitive proteins: [4Fe-4S]-FNR as an example. Methods Enzymol 463, 787-805.**E2. Products Recovery Test**

Dephosphorylation of IPP and DMAPP

Under the same enzyme reaction conditions, (NH4)3IPP and (NH4)3DMAPP (each 168 μM) were added to the HEPES buffer solution (50 mM, pH 8.0, 150 μL) containing GbHDR1-full (1.5 μM), MV (5.0 mM), and DT (7.5 mM). To this, 10 μL of ammonia solution (1.6 N) and 0.1 g of cerium oxide powder were added at 40 °C and reacted for 2 hrs with stirring. The reaction mixture was centrifuged at 10770 *g* for 5 minutes and extracted with 170 μL of ethyl acetate.

Standard curve of products

The alcohol products were analyzed by gas chromatography (GC) equipped with Agilent HP-5 capillary column and flame-ionization detector (FID). The inlet temperature was 250 °C and detector temperature was 300 °C. After injection, the oven temperature was maintained at 40 °C for 5 minutes, and raised to 150 °C with a 10 °C/min rate.

Standard curves of 3-methyl-3-buten-1-ol and 3-mthyl-2-buten-1-ol were obtained at the concentrations of 50 – 800 μL and at 10 – 100 μL, respectively. The linear relationship between peak integration and concentration were obtained with the equations of y (peak area) = 10,490,000 (± 126,000) x (mM) + 31,000 (± 52,000) (*R*2 = 0.9996) and y = 10,515,000 (± 203,000) x – 74,000 (± 12,000) (*R*2 = 0.9993) for 3-methyl-3-buten-1-ol and 3-mthyl-2-buten-1-ol, respectively.

Results

The GC peaks of 3-methyl-3-buten-1-ol and 3-mthyl-2-buten-1-ol (hydrolyzed alcohol products of IPP and DMAPP, respectively) were detected at 7.12 ± 0.02 and 8.17 ± 0.02 minutes, respectively. The average recovery yields of the alcohols were 77.4% and 69.7%, and the recovery ratio was 1 : 0.92 for 3-methyl-3-buten-1-ol : 3-mthyl-2-buten-1-ol.

GC chromatogram of standard compounds. Broken line shows control injection.

Standard curves of 3-methyl-3-buten-1-ol (left) and 3-mthyl-2-buten-1-ol (right).

| **Inj** | **3M3B1ol** | | | **3M2B1ol** | | |
| --- | --- | --- | --- | --- | --- | --- |
| **RT** | **peak area** | **mM** | **RT** | **peak area** | **mM** |
| 1_1 | 7.13 | 1319942 | 0.123 | 8.19 | 1099189 | 0.112 |
| 1_2 | 7.12 | 1324121 | 0.123 | 8.18 | 1128518 | 0.114 |
| 2_1 | 7.07 | 1383862 | 0.129 | 8.14 | 1160258 | 0.117 |
| 2_2 | 7.13 | 1499265 | 0.140 | 8.19 | 1248426 | 0.126 |
| 3_1 | 7.11 | 1400985 | 0.131 | 8.17 | 1131915 | 0.115 |
| 3_2 | 7.13 | 1438438 | 0.134 | 8.18 | 1169034 | 0.118 |
| **AVE** | 7.12 | 1394435 | 0.130 | 8.17 | 1156223 | 0.117 |
| **SD** | 0.02 | 68663.59 | 0.007 | 0.02 | 51561.8 | 0.005 |

| **Compound** | **RT** | **Area** | **µM** | **Recovery (%)*** |
| --- | --- | --- | --- | --- |
| 3M3B1ol | 7.12 ± 0.02 | 1394435 ± 72971 | 130 ± 7 | 77.4 |
| 3M2B1ol | 8.17 ± 0.02 | 1156223 ± 51562 | 117 ± 5 | 69.7 |
| * Calcd from 0.168 mM. | | |  | |

**Figure S1**. Amino acid alignment of HDRs from *Ginkgo biloba* (GbIDS1), *Pinus taeda* (PtIDS1), *Arabidopsis thaliana* (AtIDS), *Ostreococcus lucimarinus* (OlIDS), *Escherichia coli* (EcISpH), and *Aquifex aeolicus* (AaIspH). Conserved amino acid residues mentioned in the text were marked with triangles.


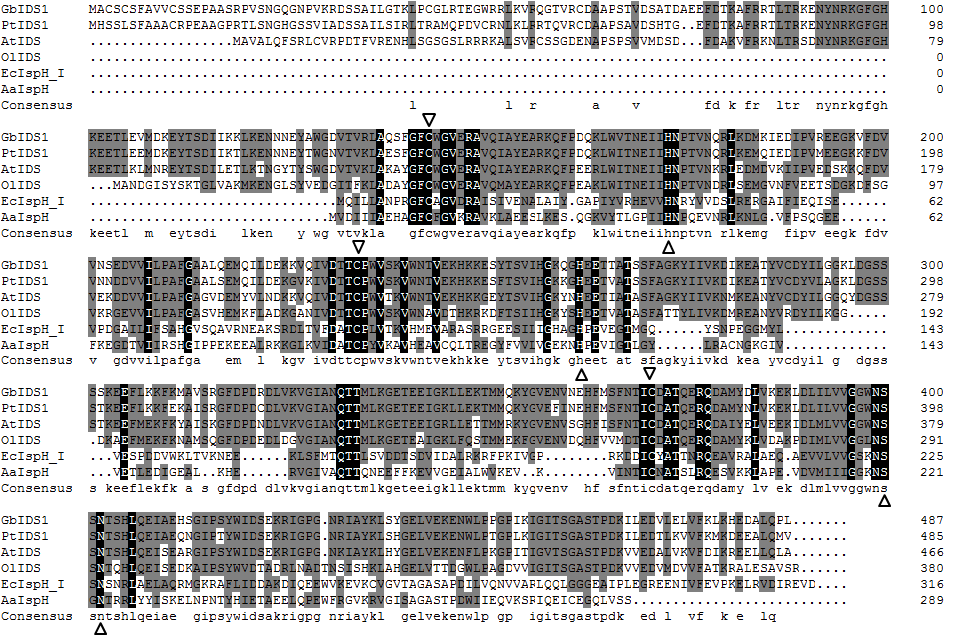


**Figure S2**. (A) SDA-PAGE of GbHDR1-full (left) and GbHDR1-truncated (right). Size marker (SM), crude extract (CE), flow through (FT) and purified proteins (P) were represented. (B) UV-Vis and (C) CD spectra of GbHDR1-full (solid line) and GbHDR1-truncated (broken line).


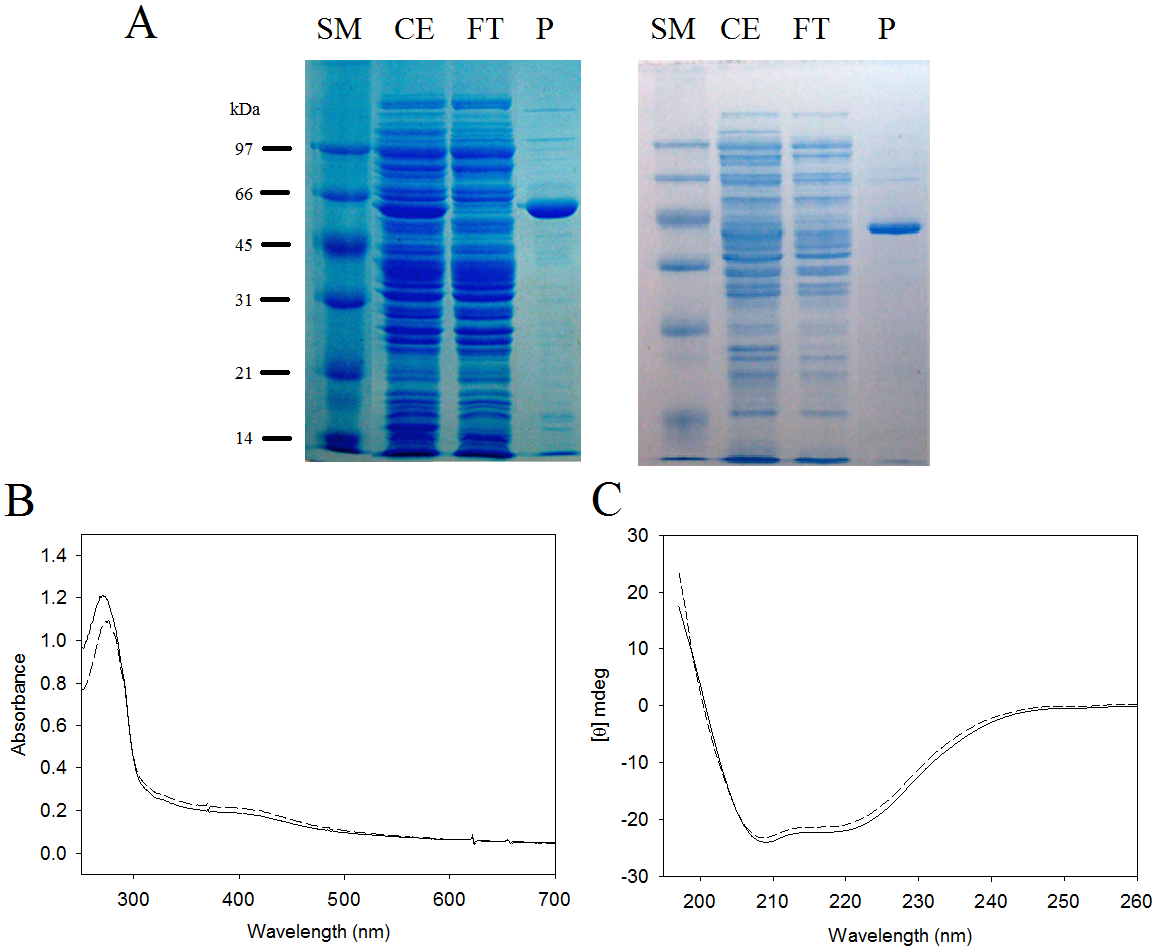


**Figure S3**. EPR spectra of GbHDR1-full (150 μM) in the presence of DT. The EPR-silent [Fe4S4]2+ cluster in the isolated protein developed typical ferredoxin-type rhombic signals upon reduction with DT. The reduced [Fe4S4]+ cluster also showed temperature-dependency, which is characteristic to the reduced cuboidal [Fe4S4]+ cluster. Spectra were recorded at 20K and 60K, microwave frequency 9.64 GHz, microwave power 0.94 mW, modulation frequency 100 kHz, modulation amplitude 10 G.


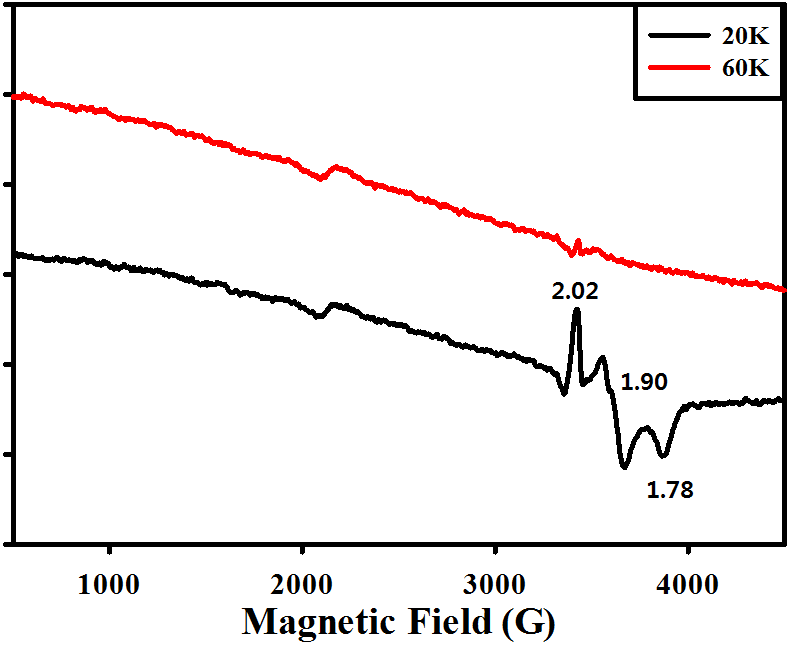


**Figure S4**. Michealis-Menten graphs of GbHDR1-truncated (solid line) and GbHDR1-full (broken line). Two-electron consumption was calculated as the consumption of one molecule of substrate.


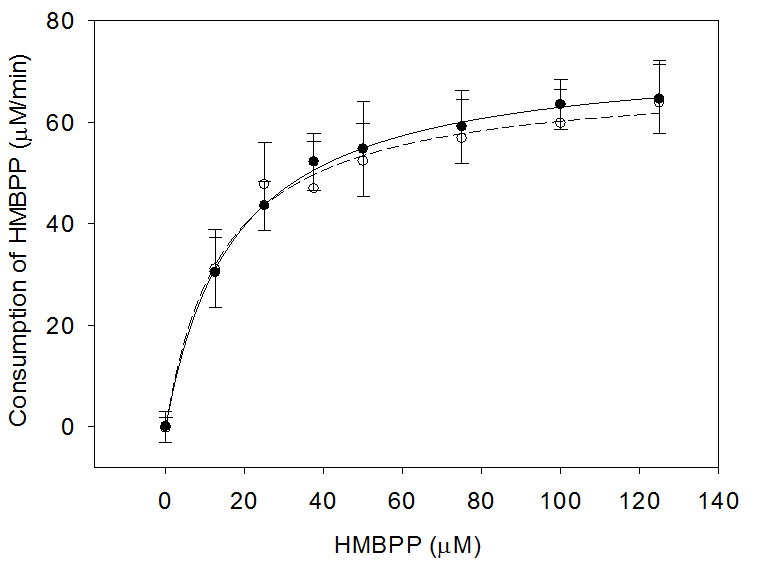
**Figure S5**. GC-MS chromatogram of the GbHDR1 reaction products (left) and the mass spectra of 3-methyl-3-buten-1-ol (A) and 3-methyl-2-buten-1-ol (B) in ethyl acetate extracts after dephosphorylation (right). Dotted line in chromatogram represents for the control data obtained without enzyme.


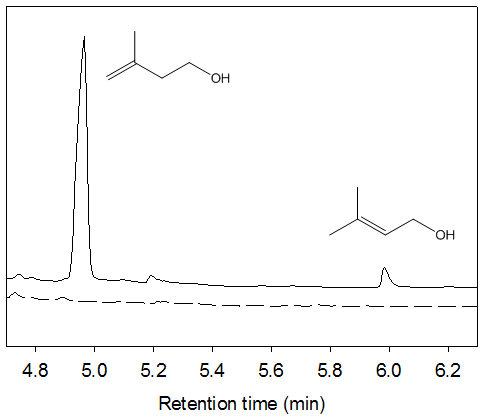

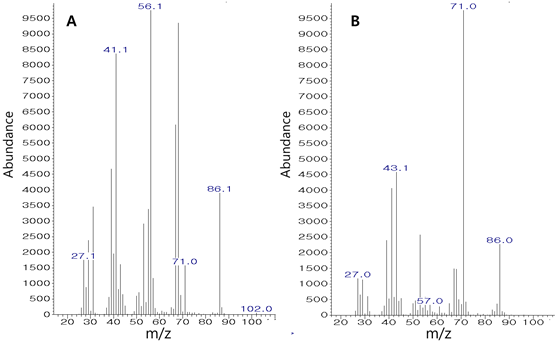


**Figure S6**. Amino acid sequences of GbHDR1-full (left) and GbHDR1-truncated (right).
